# Supplementary material for: Thermochromic VO2 films from ammonium citrato-oxovanadate(iv) with excellent optical and phase transition properties
Source: Royal Society of Chemistry journal article supplement (doi:10.1039/c6tc00315j), 2016-01-01
Supplement: c6tc00315j1.pdf [file c6tc00315j1.pdf]

## Electronic Supplementary Information

### Thermochromic VO<sub>2</sub> Films from Ammonium Citrato-oxovanadate (IV) with Excellent Optical and Phase Transition Properties

Jing Zhang,<sup>a,d</sup> Hong Tian,<sup>a</sup> Liang Hao,<sup>c</sup> Xinmin Cui,<sup>a,d</sup> Conghui Wang,<sup>a,d</sup> Jing Wang,<sup>a,d</sup> Ce Zhang,<sup>a,d</sup> Cong Zhang<sup>a,d</sup> and Yao Xu<sup>\*,b</sup>

<sup>a</sup> Institute of Coal Chemistry, Chinese Academy of Sciences, Taiyuan, Shanxi 030001, China

<sup>b</sup> State Key Laboratory of Transient Optics and Photonics, Xi'an Institute of Optics and Precision Mechanics, Chinese Academy of Sciences, Xi'an, Shaanxi 710119, China

<sup>c</sup> Key Laboratory of Cluster Science of Ministry of Education, School of Chemistry, Beijing Institute of Technology, Beijing 100081, China

<sup>d</sup> University of Chinese Academy of Sciences, Beijing 100049, China

\* Address correspondence to [xuyao@opt.ac.cn](mailto:xuyao@opt.ac.cn)

**Table S1** Bond lengths [Å] and angles [deg] for CA-V(IV)

|              |            |                    |            |                     |            |
|--------------|------------|--------------------|------------|---------------------|------------|
| V(1)-O(6)    | 1.6106(14) | O(6)-V(1)-O(5)     | 105.31(7)  | O(14)-C(10)-C(9)    | 107.15(14) |
| V(1)-O(5)    | 1.9659(12) | O(6)-V(1)-O(7)#1   | 101.01(7)  | O(14)-C(10)-C(11)   | 111.84(14) |
| V(1)-O(7)#1  | 2.0189(14) | O(5)-V(1)-O(7)#1   | 153.54(6)  | C(9)-C(10)-C(11)    | 112.39(15) |
| V(1)-O(2)    | 2.0286(14) | O(6)-V(1)-O(2)     | 94.99(7)   | O(14)-C(10)-C(12)   | 109.40(14) |
| V(1)-O(3)#1  | 2.0449(14) | O(5)-V(1)-O(2)     | 87.77(5)   | C(9)-C(10)-C(12)    | 109.36(15) |
| V(1)-O(5)#1  | 2.1937(12) | O(7)#1-V(1)-O(2)   | 87.28(6)   | C(11)-C(10)-C(12)   | 106.67(14) |
| O(5)-C(3)    | 1.424(2)   | O(6)-V(1)-O(3)#1   | 87.62(7)   | C(7)#2-C(11)-C(10)  | 110.62(15) |
| O(5)-V(1)#1  | 2.1937(12) | O(5)-V(1)-O(3)#1   | 93.25(6)   | C(7)#2-C(11)-H(11A) | 109.5      |
| O(7)-C(6)    | 1.297(2)   | O(7)#1-V(1)-O(3)#1 | 90.49(6)   | C(10)-C(11)-H(11A)  | 109.5      |
| O(7)-V(1)#1  | 2.0189(14) | O(2)-V(1)-O(3)#1   | 176.85(6)  | C(7)#2-C(11)-H(11B) | 109.5      |
| O(8)-C(6)    | 1.231(2)   | O(6)-V(1)-O(5)#1   | 163.61(7)  | C(10)-C(11)-H(11B)  | 109.5      |
| O(1)-C(1)    | 1.234(2)   | O(5)-V(1)-O(5)#1   | 75.90(5)   | H(11A)-C(11)-H(11B) | 108.1      |
| O(4)-C(4)    | 1.239(2)   | O(7)#1-V(1)-O(5)#1 | 79.65(5)   | O(9)-C(7)-O(10)     | 121.56(18) |
| O(2)-C(1)    | 1.299(2)   | O(2)-V(1)-O(5)#1   | 101.40(5)  | O(9)-C(7)-C(11)#2   | 120.58(17) |
| O(3)-C(4)    | 1.272(2)   | O(3)#1-V(1)-O(5)#1 | 75.99(5)   | O(10)-C(7)-C(11)#2  | 117.82(16) |
| O(3)-V(1)#1  | 2.0449(14) | C(3)-O(5)-V(1)     | 120.89(10) | C(10)-C(9)-C(8)     | 113.22(15) |
| C(3)-C(2)    | 1.533(2)   | C(3)-O(5)-V(1)#1   | 107.43(10) | C(10)-C(9)-H(9A)    | 108.9      |
| C(3)-C(5)    | 1.535(2)   | V(1)-O(5)-V(1)#1   | 104.10(5)  | C(8)-C(9)-H(9A)     | 108.9      |
| C(3)-C(4)    | 1.544(2)   | C(6)-O(7)-V(1)#1   | 134.53(12) | C(10)-C(9)-H(9B)    | 108.9      |
| C(5)-C(6)    | 1.515(3)   | C(1)-O(2)-V(1)     | 118.60(12) | C(8)-C(9)-H(9B)     | 108.9      |
| C(5)-H(5A)   | 0.97       | C(4)-O(3)-V(1)#1   | 117.50(12) | H(9A)-C(9)-H(9B)    | 107.7      |
| C(5)-H(5B)   | 0.97       | O(5)-C(3)-C(2)     | 111.16(14) | O(13)-C(8)-O(12)    | 122.31(19) |
| C(2)-C(1)    | 1.513(3)   | O(5)-C(3)-C(5)     | 107.98(14) | O(13)-C(8)-C(9)     | 116.74(18) |
| C(2)-H(2A)   | 0.97       | C(2)-C(3)-C(5)     | 111.01(14) | O(12)-C(8)-C(9)     | 120.95(16) |
| C(2)-H(2B)   | 0.97       | O(5)-C(3)-C(4)     | 109.36(13) | O(16)-C(12)-O(15)   | 123.65(17) |
| V(2)-O(11)   | 1.6054(15) | C(2)-C(3)-C(4)     | 107.78(14) | O(16)-C(12)-C(10)   | 120.07(17) |
| V(2)-O(14)#2 | 1.9539(13) | C(5)-C(3)-C(4)     | 109.53(15) | O(15)-C(12)-C(10)   | 116.28(15) |
| V(2)-O(10)   | 2.0163(14) | C(6)-C(5)-C(3)     | 115.85(15) | H(4C)-N(4)-H(4D)    | 108.4      |
| V(2)-O(12)   | 2.0512(14) | C(6)-C(5)-H(5A)    | 108.3      | H(4C)-N(4)-H(4A)    | 110        |
| V(2)-O(15)   | 2.0560(14) | C(3)-C(5)-H(5A)    | 108.3      | H(4D)-N(4)-H(4A)    | 110        |
| V(2)-O(14)   | 2.1938(13) | C(6)-C(5)-H(5B)    | 108.3      | H(4C)-N(4)-H(4B)    | 110        |
| O(15)-C(12)  | 1.275(2)   | C(3)-C(5)-H(5B)    | 108.3      | H(4D)-N(4)-H(4B)    | 110        |
| O(14)-C(10)  | 1.416(2)   | H(5A)-C(5)-H(5B)   | 107.4      | H(4A)-N(4)-H(4B)    | 108.5      |
| O(14)-V(2)#2 | 1.9539(13) | O(8)-C(6)-O(7)     | 120.48(18) | H(3C)-N(3)-H(3D)    | 108.1      |
| O(9)-C(7)    | 1.233(2)   | O(8)-C(6)-C(5)     | 118.48(17) | H(3C)-N(3)-H(3A)    | 109.6      |
| O(10)-C(7)   | 1.297(2)   | O(7)-C(6)-C(5)     | 121.04(16) | H(3D)-N(3)-H(3A)    | 109.6      |
| O(13)-C(8)   | 1.235(2)   | O(4)-C(4)-O(3)     | 123.99(18) | H(3C)-N(3)-H(3B)    | 109.6      |
| O(12)-C(8)   | 1.278(2)   | O(4)-C(4)-C(3)     | 119.77(17) | H(3D)-N(3)-H(3B)    | 109.6      |
| O(16)-C(12)  | 1.238(2)   | O(3)-C(4)-C(3)     | 116.23(15) | H(3A)-N(3)-H(3B)    | 110.3      |
| C(10)-C(9)   | 1.522(2)   | C(1)-C(2)-C(3)     | 110.85(15) | H(2E)-N(2)-H(2F)    | 108.9      |
| C(10)-C(11)  | 1.539(2)   | C(1)-C(2)-H(2A)    | 109.5      | H(2E)-N(2)-H(2C)    | 110.9      |
| C(10)-C(12)  | 1.539(2)   | C(3)-C(2)-H(2A)    | 109.5      | H(2F)-N(2)-H(2C)    | 110.9      |

|              |          |                    |            |                     |       |
|--------------|----------|--------------------|------------|---------------------|-------|
| C(11)-C(7)#2 | 1.514(3) | C(1)-C(2)-H(2B)    | 109.5      | H(2E)-N(2)-H(2D)    | 110.9 |
| C(11)-H(11A) | 0.97     | C(3)-C(2)-H(2B)    | 109.5      | H(2F)-N(2)-H(2D)    | 110.9 |
| C(11)-H(11B) | 0.97     | H(2A)-C(2)-H(2B)   | 108.1      | H(2C)-N(2)-H(2D)    | 104.3 |
| C(7)-C(11)#2 | 1.514(3) | O(1)-C(1)-O(2)     | 122.08(18) | H(17A)-O(17)-H(17B) | 108.5 |
| C(9)-C(8)    | 1.524(3) | O(1)-C(1)-C(2)     | 120.16(17) | H(18A)-O(18)-H(18B) | 108.3 |
| C(9)-H(9A)   | 0.97     | O(2)-C(1)-C(2)     | 117.73(16) | H(1C)-N(1)-H(1D)    | 108.2 |
| C(9)-H(9B)   | 0.97     | O(11)-V(2)-O(14)#2 | 107.41(7)  | H(1C)-N(1)-H(1A)    | 109.8 |
| N(4)-H(4C)   | 0.8999   | O(11)-V(2)-O(10)   | 96.99(8)   | H(1D)-N(1)-H(1A)    | 109.8 |
| N(4)-H(4D)   | 0.9      | O(14)#2-V(2)-O(10) | 87.63(6)   | H(1C)-N(1)-H(1B)    | 109.8 |
| N(4)-H(4A)   | 0.9      | O(11)-V(2)-O(12)   | 100.98(7)  | H(1D)-N(1)-H(1B)    | 109.8 |
| N(4)-H(4B)   | 0.9001   | O(14)#2-V(2)-O(12) | 151.50(6)  | H(1A)-N(1)-H(1B)    | 109.5 |
| N(3)-H(3C)   | 0.8998   | O(10)-V(2)-O(12)   | 86.50(6)   |                     |       |
| N(3)-H(3D)   | 0.8999   | O(11)-V(2)-O(15)   | 89.64(7)   |                     |       |
| N(3)-H(3A)   | 0.8999   | O(14)#2-V(2)-O(15) | 92.61(6)   |                     |       |
| N(3)-H(3B)   | 0.9      | O(10)-V(2)-O(15)   | 172.98(6)  |                     |       |
| N(2)-H(2E)   | 0.9      | O(12)-V(2)-O(15)   | 89.98(6)   |                     |       |
| N(2)-H(2F)   | 0.8999   | O(11)-V(2)-O(14)   | 164.35(7)  |                     |       |
| N(2)-H(2C)   | 0.9002   | O(14)#2-V(2)-O(14) | 74.63(5)   |                     |       |
| N(2)-H(2D)   | 0.9      | O(10)-V(2)-O(14)   | 98.61(5)   |                     |       |
| O(17)-H(17A) | 0.8499   | O(12)-V(2)-O(14)   | 78.73(5)   |                     |       |
| O(17)-H(17B) | 0.8501   | O(15)-V(2)-O(14)   | 74.72(5)   |                     |       |
| O(18)-H(18A) | 0.85     | C(12)-O(15)-V(2)   | 113.09(12) |                     |       |
| O(18)-H(18B) | 0.85     | C(10)-O(14)-V(2)#2 | 123.06(10) |                     |       |
| N(1)-H(1C)   | 0.9      | C(10)-O(14)-V(2)   | 107.56(10) |                     |       |
| N(1)-H(1D)   | 0.8999   | V(2)#2-O(14)-V(2)  | 105.37(5)  |                     |       |
| N(1)-H(1A)   | 0.9      | C(7)-O(10)-V(2)    | 121.53(12) |                     |       |
| N(1)-H(1B)   | 0.9      | C(8)-O(12)-V(2)    | 134.42(13) |                     |       |

**Table S2** Atomic coordinates (  $\times 10^4$ ) and equivalent isotropic displacement parameters ( $\text{Å}^2 \times 10^3$ )

for CA-V(IV)

|      | x       | y        | z       | U(eq) |
|------|---------|----------|---------|-------|
| V(1) | 5176(1) | 9373(1)  | 3991(1) | 15(1) |
| O(5) | 6487(1) | 9506(1)  | 4942(1) | 15(1) |
| O(7) | 6789(2) | 10677(2) | 6427(1) | 24(1) |
| O(8) | 9175(2) | 10560(2) | 6366(1) | 36(1) |
| O(1) | 7732(2) | 4974(2)  | 4737(1) | 35(1) |
| O(4) | 7585(2) | 6224(2)  | 6848(1) | 33(1) |
| O(6) | 6270(2) | 9035(2)  | 3038(1) | 28(1) |
| O(2) | 5788(2) | 7189(2)  | 4666(1) | 24(1) |
| O(3) | 5560(2) | 8403(2)  | 6657(1) | 24(1) |

|       |          |          |          |       |
|-------|----------|----------|----------|-------|
| C(3)  | 7645(2)  | 8193(2)  | 5484(1)  | 16(1) |
| C(5)  | 8874(2)  | 8640(2)  | 5803(2)  | 21(1) |
| C(6)  | 8254(2)  | 10042(2) | 6219(1)  | 21(1) |
| C(4)  | 6892(2)  | 7533(2)  | 6405(1)  | 19(1) |
| C(2)  | 8381(2)  | 6994(2)  | 4867(2)  | 21(1) |
| C(1)  | 7255(2)  | 6319(2)  | 4739(1)  | 21(1) |
| V(2)  | -364(1)  | 3579(1)  | 10677(1) | 17(1) |
| O(11) | -178(2)  | 2498(2)  | 11748(1) | 32(1) |
| O(15) | 1958(2)  | 2449(2)  | 10402(1) | 24(1) |
| O(14) | 53(1)    | 4661(1)  | 9180(1)  | 16(1) |
| O(9)  | -4661(2) | 5883(2)  | 11687(1) | 39(1) |
| O(10) | -2669(2) | 4778(2)  | 10768(1) | 25(1) |
| O(13) | -1805(2) | 2106(2)  | 8560(1)  | 44(1) |
| O(12) | -918(2)  | 2415(2)  | 9853(1)  | 28(1) |
| O(16) | 3310(2)  | 1189(2)  | 9275(1)  | 28(1) |
| C(10) | 1160(2)  | 3535(2)  | 8726(1)  | 16(1) |
| C(11) | 2206(2)  | 4137(2)  | 7991(1)  | 21(1) |
| C(7)  | -3266(2) | 5484(2)  | 11474(1) | 21(1) |
| C(9)  | 263(2)   | 2907(2)  | 8240(1)  | 22(1) |
| C(8)  | -898(2)  | 2444(2)  | 8933(2)  | 23(1) |
| C(12) | 2238(2)  | 2280(2)  | 9516(1)  | 19(1) |
| N(4)  | 3625(2)  | 9508(2)  | 1458(1)  | 25(1) |
| N(3)  | 3974(2)  | 4033(2)  | 1238(1)  | 34(1) |
| N(2)  | 12247(2) | 8721(2)  | 7010(2)  | 40(1) |
| O(17) | 6789(2)  | 1520(2)  | 1001(2)  | 47(1) |
| O(18) | 3826(2)  | 6283(2)  | 6066(2)  | 49(1) |
| N(1)  | 6819(3)  | 3546(2)  | 6673(2)  | 37(1) |

**Table S3** Anisotropic displacement parameters ( $\text{Å}^2 \times 10^3$ ) for CA-V(IV)

|      | U11   | U22   | U33   | U23    | U13   | U12    |
|------|-------|-------|-------|--------|-------|--------|
| V(1) | 14(1) | 17(1) | 15(1) | -6(1)  | 1(1)  | -4(1)  |
| O(5) | 12(1) | 13(1) | 17(1) | -4(1)  | -1(1) | -3(1)  |
| O(7) | 17(1) | 31(1) | 28(1) | -14(1) | -2(1) | -7(1)  |
| O(8) | 24(1) | 38(1) | 55(1) | -20(1) | -2(1) | -16(1) |
| O(1) | 30(1) | 19(1) | 56(1) | -13(1) | -5(1) | -5(1)  |
| O(4) | 33(1) | 21(1) | 32(1) | 5(1)   | 0(1)  | -3(1)  |
| O(6) | 27(1) | 32(1) | 23(1) | -12(1) | 7(1)  | -8(1)  |
| O(2) | 19(1) | 18(1) | 34(1) | -6(1)  | 0(1)  | -7(1)  |
| O(3) | 20(1) | 22(1) | 24(1) | 0(1)   | 5(1)  | -6(1)  |
| C(3) | 11(1) | 15(1) | 20(1) | -4(1)  | -1(1) | -3(1)  |
| C(5) | 14(1) | 23(1) | 28(1) | -8(1)  | -2(1) | -6(1)  |
| C(6) | 19(1) | 23(1) | 20(1) | -3(1)  | -3(1) | -8(1)  |

|       |       |       |       |        |       |        |
|-------|-------|-------|-------|--------|-------|--------|
| C(4)  | 19(1) | 18(1) | 20(1) | -2(1)  | -2(1) | -7(1)  |
| C(2)  | 14(1) | 18(1) | 28(1) | -8(1)  | 2(1)  | -3(1)  |
| C(1)  | 20(1) | 17(1) | 24(1) | -5(1)  | 0(1)  | -5(1)  |
| V(2)  | 19(1) | 15(1) | 16(1) | -4(1)  | 2(1)  | -7(1)  |
| O(11) | 44(1) | 27(1) | 23(1) | 1(1)   | 2(1)  | -16(1) |
| O(15) | 23(1) | 23(1) | 19(1) | -4(1)  | -3(1) | 0(1)   |
| O(14) | 16(1) | 15(1) | 16(1) | -7(1)  | 1(1)  | -5(1)  |
| O(9)  | 24(1) | 52(1) | 50(1) | -29(1) | 14(1) | -19(1) |
| O(10) | 19(1) | 34(1) | 26(1) | -14(1) | 3(1)  | -11(1) |
| O(13) | 45(1) | 67(1) | 41(1) | -14(1) | -4(1) | -41(1) |
| O(12) | 37(1) | 31(1) | 27(1) | -13(1) | 7(1)  | -23(1) |
| O(16) | 23(1) | 22(1) | 32(1) | -9(1)  | 4(1)  | -1(1)  |
| C(10) | 16(1) | 17(1) | 16(1) | -7(1)  | 2(1)  | -6(1)  |
| C(11) | 24(1) | 25(1) | 18(1) | -8(1)  | 6(1)  | -12(1) |
| C(7)  | 21(1) | 22(1) | 21(1) | -5(1)  | 5(1)  | -10(1) |
| C(9)  | 22(1) | 26(1) | 22(1) | -13(1) | 1(1)  | -10(1) |
| C(8)  | 20(1) | 21(1) | 30(1) | -10(1) | -1(1) | -8(1)  |
| C(12) | 16(1) | 18(1) | 23(1) | -6(1)  | 1(1)  | -7(1)  |
| N(4)  | 26(1) | 27(1) | 22(1) | -2(1)  | -1(1) | -12(1) |
| N(3)  | 36(1) | 35(1) | 30(1) | -5(1)  | -5(1) | -13(1) |
| N(2)  | 28(1) | 43(1) | 52(1) | -3(1)  | -3(1) | -19(1) |
| O(17) | 49(1) | 40(1) | 61(1) | -21(1) | 18(1) | -26(1) |
| O(18) | 54(1) | 63(1) | 46(1) | -14(1) | 4(1)  | -39(1) |
| N(1)  | 46(1) | 29(1) | 33(1) | -6(1)  | 7(1)  | -13(1) |

**Table S4** Hydrogen coordinates ( $\times 10^4$ ) and isotropic displacement parameters ( $\text{Å}^2 \times 10^3$ ) for CA-V(IV)

|        | x    | y     | z    | U(eq) |
|--------|------|-------|------|-------|
| H(5A)  | 9527 | 7815  | 6295 | 26    |
| H(5B)  | 9530 | 8781  | 5238 | 26    |
| H(2A)  | 8680 | 7439  | 4226 | 25    |
| H(2B)  | 9312 | 6213  | 5189 | 25    |
| H(11A) | 2828 | 3390  | 7616 | 26    |
| H(11B) | 1565 | 5026  | 7533 | 26    |
| H(9A)  | 995  | 2044  | 7999 | 26    |
| H(9B)  | -291 | 3657  | 7678 | 26    |
| H(4C)  | 3101 | 10447 | 1122 | 30    |
| H(4D)  | 3058 | 8968  | 1461 | 30    |
| H(4A)  | 4554 | 9099  | 1168 | 30    |
| H(4B)  | 3786 | 9520  | 2079 | 30    |
| H(3C)  | 4452 | 4624  | 1303 | 41    |

|        |       |      |      |    |
|--------|-------|------|------|----|
| H(3D)  | 3442  | 3884 | 1798 | 41 |
| H(3A)  | 3312  | 4486 | 729  | 41 |
| H(3B)  | 4689  | 3148 | 1139 | 41 |
| H(2E)  | 11893 | 8143 | 7480 | 48 |
| H(2F)  | 13285 | 8383 | 7064 | 48 |
| H(2C)  | 11988 | 8721 | 6407 | 48 |
| H(2D)  | 11784 | 9686 | 7058 | 48 |
| H(17A) | 7486  | 1738 | 645  | 56 |
| H(17B) | 6805  | 712  | 894  | 56 |
| H(18A) | 3335  | 5926 | 5792 | 59 |
| H(18B) | 4060  | 5759 | 6646 | 59 |
| H(1C)  | 6160  | 3782 | 7179 | 44 |
| H(1D)  | 6856  | 2681 | 6563 | 44 |
| H(1A)  | 6478  | 4276 | 6131 | 44 |
| H(1B)  | 7773  | 3435 | 6824 | 44 |

**Table S5** Torsion angles [deg] for CA-V(IV)

|                         |             |
|-------------------------|-------------|
| O(6)-V(1)-O(5)-C(3)     | -76.23(13)  |
| O(7)#1-V(1)-O(5)-C(3)   | 97.69(16)   |
| O(2)-V(1)-O(5)-C(3)     | 18.34(12)   |
| O(3)#1-V(1)-O(5)-C(3)   | -164.65(12) |
| O(5)#1-V(1)-O(5)-C(3)   | 120.68(13)  |
| O(6)-V(1)-O(5)-V(1)#1   | 163.10(7)   |
| O(7)#1-V(1)-O(5)-V(1)#1 | -22.99(14)  |
| O(2)-V(1)-O(5)-V(1)#1   | -102.34(6)  |
| O(3)#1-V(1)-O(5)-V(1)#1 | 74.68(6)    |
| O(5)#1-V(1)-O(5)-V(1)#1 | 0           |
| O(6)-V(1)-O(2)-C(1)     | 49.10(15)   |
| O(5)-V(1)-O(2)-C(1)     | -56.08(14)  |
| O(7)#1-V(1)-O(2)-C(1)   | 149.92(14)  |
| O(5)#1-V(1)-O(2)-C(1)   | -131.21(14) |
| V(1)-O(5)-C(3)-C(2)     | 34.43(18)   |
| V(1)#1-O(5)-C(3)-C(2)   | 153.46(11)  |
| V(1)-O(5)-C(3)-C(5)     | 156.42(11)  |
| V(1)#1-O(5)-C(3)-C(5)   | -84.55(13)  |
| V(1)-O(5)-C(3)-C(4)     | -84.46(15)  |
| V(1)#1-O(5)-C(3)-C(4)   | 34.57(15)   |
| O(5)-C(3)-C(5)-C(6)     | 45.0(2)     |
| C(2)-C(3)-C(5)-C(6)     | 167.06(16)  |
| C(4)-C(3)-C(5)-C(6)     | -74.0(2)    |
| V(1)#1-O(7)-C(6)-O(8)   | 160.29(16)  |
| V(1)#1-O(7)-C(6)-C(5)   | -20.3(3)    |
| C(3)-C(5)-C(6)-O(8)     | -170.62(18) |

---

|                           |             |
|---------------------------|-------------|
| C(3)-C(5)-C(6)-O(7)       | 10.0(3)     |
| V(1)#1-O(3)-C(4)-O(4)     | 167.56(16)  |
| V(1)#1-O(3)-C(4)-C(3)     | -12.6(2)    |
| O(5)-C(3)-C(4)-O(4)       | 162.86(17)  |
| C(2)-C(3)-C(4)-O(4)       | 41.9(2)     |
| C(5)-C(3)-C(4)-O(4)       | -79.0(2)    |
| O(5)-C(3)-C(4)-O(3)       | -17.0(2)    |
| C(2)-C(3)-C(4)-O(3)       | -137.92(17) |
| C(5)-C(3)-C(4)-O(3)       | 101.19(18)  |
| O(5)-C(3)-C(2)-C(1)       | -71.94(19)  |
| C(5)-C(3)-C(2)-C(1)       | 167.84(15)  |
| C(4)-C(3)-C(2)-C(1)       | 47.88(19)   |
| V(1)-O(2)-C(1)-O(1)       | -148.79(17) |
| V(1)-O(2)-C(1)-C(2)       | 33.4(2)     |
| C(3)-C(2)-C(1)-O(1)       | -143.31(19) |
| C(3)-C(2)-C(1)-O(2)       | 34.5(2)     |
| O(11)-V(2)-O(15)-C(12)    | 141.91(14)  |
| O(14)#2-V(2)-O(15)-C(12)  | -110.67(13) |
| O(12)-V(2)-O(15)-C(12)    | 40.93(13)   |
| O(14)-V(2)-O(15)-C(12)    | -37.39(12)  |
| O(11)-V(2)-O(14)-C(10)    | 33.1(3)     |
| O(14)#2-V(2)-O(14)-C(10)  | 132.87(12)  |
| O(10)-V(2)-O(14)-C(10)    | -142.01(10) |
| O(12)-V(2)-O(14)-C(10)    | -57.36(11)  |
| O(15)-V(2)-O(14)-C(10)    | 35.74(10)   |
| O(11)-V(2)-O(14)-V(2)#2   | -99.7(3)    |
| O(14)#2-V(2)-O(14)-V(2)#2 | 0           |
| O(10)-V(2)-O(14)-V(2)#2   | 85.12(6)    |
| O(12)-V(2)-O(14)-V(2)#2   | 169.77(7)   |
| O(15)-V(2)-O(14)-V(2)#2   | -97.13(6)   |
| O(11)-V(2)-O(10)-C(7)     | 56.50(16)   |
| O(14)#2-V(2)-O(10)-C(7)   | -50.76(15)  |
| O(12)-V(2)-O(10)-C(7)     | 157.15(15)  |
| O(14)-V(2)-O(10)-C(7)     | -124.82(14) |
| O(11)-V(2)-O(12)-C(8)     | -161.97(19) |
| O(14)#2-V(2)-O(12)-C(8)   | 23.1(3)     |
| O(10)-V(2)-O(12)-C(8)     | 101.59(19)  |
| O(15)-V(2)-O(12)-C(8)     | -72.33(19)  |
| O(14)-V(2)-O(12)-C(8)     | 2.08(18)    |
| V(2)#2-O(14)-C(10)-C(9)   | -148.69(12) |
| V(2)-O(14)-C(10)-C(9)     | 88.79(13)   |
| V(2)#2-O(14)-C(10)-C(11)  | -25.11(19)  |
| V(2)-O(14)-C(10)-C(11)    | -147.63(12) |
| V(2)#2-O(14)-C(10)-C(12)  | 92.85(15)   |

---

---

|                          |             |
|--------------------------|-------------|
| V(2)-O(14)-C(10)-C(12)   | -29.67(15)  |
| O(14)-C(10)-C(11)-C(7)#2 | 68.61(19)   |
| C(9)-C(10)-C(11)-C(7)#2  | -170.81(15) |
| C(12)-C(10)-C(11)-C(7)#2 | -50.96(19)  |
| V(2)-O(10)-C(7)-O(9)     | -160.81(16) |
| V(2)-O(10)-C(7)-C(11)#2  | 21.5(2)     |
| O(14)-C(10)-C(9)-C(8)    | -51.1(2)    |
| C(11)-C(10)-C(9)-C(8)    | -174.39(15) |
| C(12)-C(10)-C(9)-C(8)    | 67.34(19)   |
| V(2)-O(12)-C(8)-O(13)    | -150.65(18) |
| V(2)-O(12)-C(8)-C(9)     | 29.2(3)     |
| C(10)-C(9)-C(8)-O(13)    | 170.97(19)  |
| C(10)-C(9)-C(8)-O(12)    | -8.9(3)     |
| V(2)-O(15)-C(12)-O(16)   | -148.27(16) |
| V(2)-O(15)-C(12)-C(10)   | 32.09(19)   |
| O(14)-C(10)-C(12)-O(16)  | -178.97(16) |
| C(9)-C(10)-C(12)-O(16)   | 64.0(2)     |
| C(11)-C(10)-C(12)-O(16)  | -57.8(2)    |
| O(14)-C(10)-C(12)-O(15)  | 0.7(2)      |
| C(9)-C(10)-C(12)-O(15)   | -116.39(18) |
| C(11)-C(10)-C(12)-O(15)  | 121.83(17)  |

---

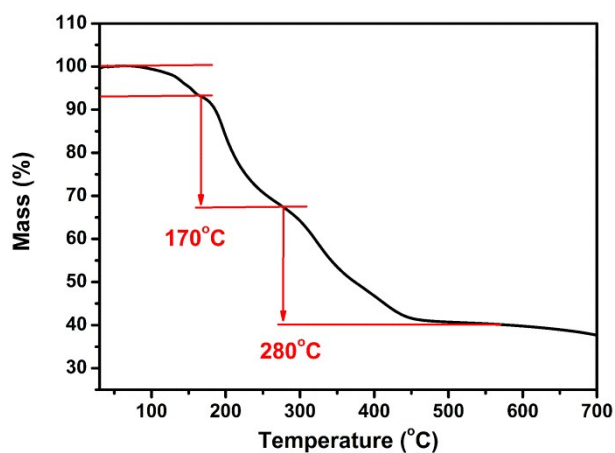

Figure S1. TGA (mass%) spectrum of CA-V(IV) in Ar.
